# Supplementary material for: Network Analysis of Gene Transcriptions of Arabidopsis thaliana in Spaceflight Microgravity
Source: MDPI journal article supplement (doi:10.3390/genes12030337), 2021-02-25
Supplement: s1 [file s1]

**Supplementary Table S1.** Hub genes differentially and significantly expressed only in spaceflight microgravity networks for each of the ecotypes, with their gene name and most prominent gene ontology.

| Ecotype          | ATG number | Gene name/Description                                                             | Enriched gene set (biological process)                                                      |
|------------------|------------|-----------------------------------------------------------------------------------|---------------------------------------------------------------------------------------------|
| Col_ <i>phyD</i> | AT1G02140  | Protein mago                                                                      | Part of cytoplasm, enables protein binding, involved in RNA splicing, mRNA processing       |
|                  | AT1G06400  | Ras-related protein RABA1a                                                        | Involved in cell wall biogenesis, protein transport, response to auxin, enables GTP binding |
|                  | AT1G05620  | Probable uridine nucleosidase 2                                                   | Enables purine nucleoside activity                                                          |
|                  | AT1G04250  | Auxin responsive protein                                                          | Involved in auxin-activated signaling pathway                                               |
|                  | AT1G05720  | Sep15_SelM domain-containing protein                                              | Enables oxidoreductase activity                                                             |
|                  | AT1G06040  | Encodes salt tolerance protein (STO) which confers salt tolerance to yeast cells. | Enables protein, DNA, zinc ion binding, response to karrikin                                |
|                  | AT1G02130  | This small GTP-binding protein is required in ER to Golgi transportation.         | nuclear-transcribed mRNA catabolic process                                                  |
|                  | AT1G04690  | Putative K <sup>+</sup> channel                                                   | Involved in potassium ion transport                                                         |
|                  | AT1G06900  | Nardilysin like                                                                   | Enables metal ion binding                                                                   |
|                  | AT1G05890  | E3 ubiquitin-protein ligase AR15                                                  | Involved in protein ubiquitination                                                          |
|                  | AT1G01090  | Pyruvate dehydrogenase E1 component subunit alpha-3, chloroplastic                | Involved in acetyl-CoA biosynthetic process from pyruvate                                   |
|                  | AT1G04040  | At1g04040/F21M11_2                                                                | Involved in dephosphorylation                                                               |
|                  | AT1G06110  | F-box protein SKIP 16                                                             | Enables protein binding                                                                     |
|                  | AT1G02816  | F22D16.19 protein                                                                 | Enables molecular function                                                                  |

|       |           |                                                                                  |                                                                                                                              |
|-------|-----------|----------------------------------------------------------------------------------|------------------------------------------------------------------------------------------------------------------------------|
|       | AT1G06570 | 4-hydroxyphenylpyruvate dioxygenase                                              | Involved in tyrosine catabolic process                                                                                       |
|       | AT1G04850 | UBA domain-containing protein                                                    | Part of extracellular region                                                                                                 |
|       | AT1G04750 | Vesicle associated membrane protein                                              | Enables protein binding                                                                                                      |
|       | AT1G02090 | COP9 signalosome complex subunit 7                                               | nuclear-transcribed mRNA catabolic process                                                                                   |
|       | AT1G03900 | Member of NAP protein family                                                     | nuclear-transcribed mRNA catabolic process                                                                                   |
|       | AT1G06670 | nuclear DEIH-box helicase (NIH) encoding a putative RNA and/or DNA helicase      | GIN5 complex essential to the DNA replication process in the cells of eukaryotes; nuclear-transcribed mRNA catabolic process |
|       | AT1G04820 | Encodes an alpha tubulin isoform that is expressed in roots, leaves and flowers. | GIN5 complex; nuclear-transcribed mRNA catabolic process                                                                     |
| Col_0 | AT1G04750 | vesicle-associated membrane protein 7B (At VAMP7B) mRNA,                         | Cellular component organization or biogenesis                                                                                |
|       | AT1G06570 | 4-hydroxyphenylpyruvate dioxygenase                                              | Involved in tyrosine catabolic process                                                                                       |
|       | AT1G04250 | Auxin responsive protein                                                         | Involved in auxin-activated signaling pathway                                                                                |
|       | AT1G04850 | UBA domain-containing protein                                                    | Part of extracellular region                                                                                                 |
|       | AT1G04750 | Vesicle-associated membrane protein 721                                          | Enables protein binding                                                                                                      |
|       | AT1G01300 | Aspartyl protease protein family 2                                               | Enables hydrolase, peptidase activity                                                                                        |
|       | AT1G05890 | Ubiquitin-protein ligase AR15                                                    | nuclear-transcribed mRNA catabolic process                                                                                   |

|    |           |                                                                                      |                                                                                                               |
|----|-----------|--------------------------------------------------------------------------------------|---------------------------------------------------------------------------------------------------------------|
|    | AT1G01160 | Arabidopsis thaliana GRF1-interacting factor 2 (GIF2) mRNA                           | Enables protein binding                                                                                       |
|    | AT1G06700 | PTI1-like tyrosine-protein kinase 1                                                  | Enables kinase, transferase activity                                                                          |
| WS | AT1G06550 | Encodes salt tolerance protein (STO) which confers salt tolerance to yeast cells     | Cellular component organization or biogenesis<br>Enables protein, DNA, zinc ion binding, response to karrikin |
|    | AT1G04690 | Putative K <sup>+</sup> channel                                                      | Involved in potassium ion transport                                                                           |
|    | AT1G01090 | Pyruvate dehydrogenase                                                               | Involved in the oxidation-reduction process                                                                   |
|    | AT1G05260 | Encodes a cold-inducible cationic peroxidase that is involved in the stress response | Involved in cellular oxidant detoxification, desiccation and cold                                             |
|    | AT1G03870 | Enables protein binding Fasciclin-like arabinogalactan protein 9                     | Involved in plant-type secondary cell wall biogenesis                                                         |
|    | AT1G03900 | Uncharacterized protein                                                              | Involved in vesicle-mediated transport                                                                        |
|    | AT1G02335 | Germin-like protein                                                                  | Involved in the regulation of root development                                                                |

**Supplementary Table S2.** Hub genes related to cell wall biosynthesis processes with transcriptional abundance in spaceflight microgravity, gene name and their most prominent gene ontology.

| Ecotype | ATG Number | Gene name/Description                | Enriched gene set (biological process) |
|---------|------------|--------------------------------------|----------------------------------------|
| Col-0   | AT2G27860  | UDP-D-apiose/UDP-D-xylose synthase 1 | Nucleotide-sugar biosynthetic process  |
|         | AT1G73250  | GDP-L-fucose synthase 1              | Oxidoreductase activity                |
|         | AT1G08200  | UDP-D-apiose/UDP-D-xylose synthase 2 | Involved in cell wall organization     |
|         | AT2G47650  | UDP-glucuronic acid decarboxylase 4  | Involved in D-xylose metabolic process |

|          |           |                                                                                    |                                                         |
|----------|-----------|------------------------------------------------------------------------------------|---------------------------------------------------------|
|          | AT2G28760 | UDP-XYL synthase 6                                                                 | Enables UDP-glucuronate decarboxylase activity          |
|          | AT3G14790 | dTDP-glucose 4,6-dehydratase                                                       | Involved in auxin efflux                                |
|          | AT1G63000 | Bifunctional dTDP-4-dehydrorhamnose 3,5-epimerase/dTDP-4-dehydrorhamnose reductase | Enables dTDP-4-dehydrorhamnose 3,5-epimerase activity   |
|          | AT2G34850 | Putative UDP-arabinose 4-epimerase 2                                               | Enables UDP-glucose 4-epimerase activity                |
|          | AT1G17890 | Putative GDP-L-fucose synthase 2                                                   | Involved in 'de novo' GDP-L-fucose biosynthetic process |
|          | AT1G02000 | Putative nucleotide sugar epimerase                                                | Enables catalytic activity                              |
|          | AT1G63180 | UDP-glucose 4-epimerase                                                            | Enables UDP-arabinose 4-epimerase activity              |
|          | AT1G30620 | UDP-arabinose 4-epimerase 1                                                        | Enables UDP-glucose 4-epimerase activity                |
|          | AT4G20460 | Probable UDP-arabinose 4-epimerase 3                                               | Enables UDP-arabinose 4-epimerase activity              |
|          | AT4G23920 | UDP-glucose 4-epimerase 2                                                          | Enables UDP-glucose 4-epimerase activity                |
| Col_phyD | AT1G12780 | UDP-glucose 4-epimerase                                                            | Part of cytosol                                         |
|          | AT1G08200 | UDP-D-apiose/UDP-D-xylose synthase 2                                               | Involved in cell wall organization                      |
|          | AT1G63000 | Bifunctional dTDP-4-dehydrorhamnose 3,5-epimerase/dTDP-4-dehydrorhamnose reductase | Enables dTDP-4-dehydrorhamnose 3,5-epimerase activity   |

|    |           |                                      |                                                         |
|----|-----------|--------------------------------------|---------------------------------------------------------|
|    | AT3G53520 | UDP-glucuronic acid decarboxylase 1  | Enables UDP-glucuronate decarboxylase activity          |
|    | AT2G47650 | UDP-glucuronic acid decarboxylase 4  | Involved in D-xylose metabolic process                  |
|    | AT4G12250 | UDP-glucuronate 4-epimerase 5        | Part of Golgi cisterna membrane                         |
|    | AT5G39320 | UDP-glucose 6-dehydrogenase 4        | Part of cytosol                                         |
|    | AT1G26570 | UDP-glucose 6-dehydrogenase 1        | Involved in UDP-glucuronate biosynthetic process        |
|    | AT1G63180 | UDP-glucose 4-epimerase              | Enables UDP-arabinose 4-epimerase activity              |
|    | AT1G73250 | GDP-L-fucose synthase 1              | Oxidoreductase activity                                 |
|    | AT2G27860 | UDP-D-apiose/UDP-D-xylose synthase 1 | Nucleotide-sugar biosynthetic process                   |
|    | AT1G02000 | Putative nucleotide sugar epimerase  | Enables catalytic activity                              |
|    | AT1G64440 | UDP-glucose 4-epimerase 4            | Involved in carbohydrate metabolic process              |
| WS | AT1G08200 | UDP-D-apiose/UDP-D-xylose synthase 2 | Involved in cell wall organization                      |
|    | AT3G29360 | UDP-glucose 6-dehydrogenase 2        | Enables UDP-glucose 6-dehydrogenase activity            |
|    | AT1G64440 | UDP-glucose 4-epimerase 4            | Involved in carbohydrate metabolic process              |
|    | AT1G30620 | UDP-arabinose 4-epimerase 1          | Enables UDP-glucose 4-epimerase activity                |
|    | AT4G12250 | UDP-glucuronate 4-epimerase 5        | Part of Golgi cisterna membrane                         |
|    | AT4G30440 | UDP-glucuronate 4-epimerase 1        | Involved in carbohydrate metabolic process              |
|    | AT1G17890 | Putative GDP-L-fucose synthase 2     | Involved in 'de novo' GDP-L-fucose biosynthetic process |

|  |           |                                             |                                                  |
|--|-----------|---------------------------------------------|--------------------------------------------------|
|  | AT3G51160 | GDP-mannose 4,6<br>dehydratase 2            | Enables GDP-mannose 4,6-dehydratase<br>activity  |
|  | AT1G02000 | UDP-D-apiose/UDP-D-<br>xylose synthase 2    | Enables catalytic activity                       |
|  | AT1G78570 | UDP-4-keto-L-<br>rhamnose-reductase<br>RHM1 | Involved in UDP-rhamnose<br>biosynthetic process |
